# Supplementary material for: Molecular and Clinical Aspects of Targeting the VEGF Pathway in Tumors
Source: Hindawi journal article supplement (doi:10.1155/2010/652320), 2010-01-01
Supplement: f1 [file 652320.f1.pdf]

**Table 1. Potential markers of tumor blood vessels**

| Targeting moiety            | Antigen                               | Location of marker            | Reference                                 |
|-----------------------------|---------------------------------------|-------------------------------|-------------------------------------------|
| Multiple                    | VEGF:VEGFR                            | Angiogenic BV                 | [154] [155]<br>[156] [157]                |
| MKID2                       | $\alpha_3\beta_1$                     | Angiogenic BV                 | [158]                                     |
| GoH3                        | $\alpha_6\beta_1$                     | Angiogenic BV                 | [158]                                     |
| EN7/44                      | p30.5                                 | Proliferating EC              | [159]                                     |
| Multiple                    | CD105 (endoglin)                      | Proliferating EC              | [160] [161]<br>[162] [163]<br>[164] [165] |
| FB5                         | Endosialin                            | Proliferating EC              | [166]                                     |
| MK 2.7                      | VCAM-1                                | Activated EC                  | [167]                                     |
|                             | E-selectin, CD62E                     | Activated EC                  | [167]                                     |
| 4A11                        | H-5-2, Lewis <sup>y</sup> -6          | Activated EC                  | [168]                                     |
|                             | CD44                                  | Activated EC                  | [169]                                     |
| Metastatin                  | Hyaluronan                            | Activated EC                  | [170]                                     |
| Vitaxin; RGD cyclic peptide | $\alpha_v\beta_3$ ; $\alpha_v\beta_5$ | Activated EC                  | [171] [172]<br>[173]                      |
| Multiple                    | $\alpha_1\beta_1$ ; $\alpha_2\beta_1$ | Activated EC                  | [174] [175]                               |
| Multiple                    | $\alpha_5\beta_1$                     | Activated EC                  | [176]                                     |
| 3SB, 3G4                    | Phosphatidylserine                    | Activated EC                  | [167]                                     |
| TV-1                        | FN                                    | Basement membrane             | [177]                                     |
| L19                         | ED-B isoform of FN                    | Basement membrane             | [178] [179]<br>[180] [181]                |
| HUIV26, HUI77               | Denaturated collagens                 | Proteolyzed basement membrane | [182] [183]                               |
| Multiple                    | NG2 proteoglycan                      | Pericytes                     | [184]                                     |
| NGR peptide                 | CD13/APN                              | Tumor EC                      | [185]                                     |

(Abbreviations used: APN, aminopeptidase N; BV, blood vessels; EC, endothelial cells; FN, fibronectin; MMP, matrix metalloproteinases; PSMA, prostate specific membrane antigen; SMC, smooth muscle cell; TEM, tumor endothelial marker; VEGF:VEGFR, complex of VEGF and its receptor.)
